# Supplementary material
Source: PubMed Central journal article supplement (PMC8204064)
Supplement: 40846_2021_632_MOESM1_ESM.pdf [file 40846_2021_632_MOESM1_ESM.pdf]

# ECG paper record digitization and diagnosis using deep learning

Siddharth Mishra, Gaurav Khatwani, Rupali Patil, Darshan Sapariya, Vruddhi Shah, Darsh Parmar, Sharath Dinesh, Prathamesh Daphal, Ninad Mehendale

## S1 : Code for PDF to JPG conversion

| Code                                                                                                       | Comments                                                |
|------------------------------------------------------------------------------------------------------------|---------------------------------------------------------|
| <pre>from pdf2image import convert_from_path import os import sys import shutil</pre>                      | Importing required libraries                            |
| <pre>outputdir = "cd4_pdf3/" count = 1 def convert(file, outputdir):     global count</pre>                | Specifies the directory where the output will be saved  |
| <pre>if not os.path.exists(outputdir):     os.makedirs(outputdir)</pre>                                    | Checking if the output directory exists in the location |
| <pre>pages = convert_from_path(file)</pre>                                                                 | Converting all the pages of pdfs into list of images    |
| <pre>for page in pages:     myfile = outputdir + 'image' + str(count) + '.jpg'     count = count + 1</pre> | Iterating through all pages of provided pdf             |

```
    page.save(myfile, "JPEG")
    print(myfile)
    print(file)
args = sys.argv
if len(args) > 1:
    file = args[1]
```

```
pdfs = os.listdir(file)
j = 0
for i in range(len(pdfs)):
```

```
    if pdfs[i].endswith('.pdf'):
        j = j + 1
        convert(file + pdfs[i], outputdir)
    else:
        if not os.path.exists(outputdir):
            os.makedirs(outputdir)
```

```
        shutil.copy(file + pdfs[i], outputdir)
```

Storing the images in the output directory

Checking if the file is in pdf format, if yes, it will convert it into images

If the file is not in pdf format, it will just

copy the file into output directory

## S2 : Extraction of 12-Lead ECGs from Image Code

```
import cv2
import os

def click_event(event, x, y, flags, param):
    if event == cv2.EVENT_LBUTTONDOWN:
        print(x,y)
```

Comments

Importing required Libraries

Left mouse click will give us the coordinate of the point, helps in hardcoding

```
image = cv2.imread('image4.jpg')
scale_percent = 20
```

Reading and resizing the image

```
width = int(image.shape[1] * scale_percent / 100)
height = int(image.shape[0] * scale_percent / 100)
```

calculate the 50 percent of original dimensions

```
dsize = (width, height)
print(dsize)
```

```
image = cv2.resize(image, (1097,774))
```

resize image

```
cv2.imshow('Image', image)
cv2.setMouseCallback('Image', click_event)
cv2.waitKey(0)
graph = []
```

```
for i in range(3):
    for j in range(4):
        graph.append(image[336+118*i:437+118*i,
42+254*j:296+254*j])
print(len(graph))
outputdir = "graphs4/"
```

Slicing the coordinates of the rectangles of the 12 leads into a list

```
for i in range(12):
    cv2.imshow('graph'+str(i+1), graph[i])
    if not os.path.exists(outputdir):
        os.makedirs(outputdir)
        cv2.imwrite(outputdir+"graph"+str(i+1)+".jpg", graph[i])
    else:
        cv2.imwrite(outputdir+"graph"+str(i+1)+".jpg", graph[i])
cv2.waitKey(0)
cv2.destroyAllWindows()
```

Saving the 12 separate leads into the output directory

### S3:Extraction of 12-Lead ECG signal from continuous ECG

Code

```
import cv2
import os
for k in range(1,2):
    cv2.namedWindow('Image',cv2.WINDOW_NORMAL
)
    cv2.resizeWindow('Image', 1000, 800)

    array_x = []
    array_y = []
    array_x.append(0)
    array_y.append(0)
    def click_event(event, x, y, flags, param):

        if event == cv2.EVENT_LBUTTONDOWN:

            print("x = ", x)
            array_x.append(x)
            cv2.line(image,(x,0), (x,height), (0,0,0),
thickness= 4 )
            cv2.imshow('Image', image)

        if event == cv2.EVENT_RBUTTONDOWN:

            print("y = ", y)
            array_y.append(y)
```

Comments

Importing the libraries

arrays to store

If a left mouse click event occurs, a vertical black line will be drawn on the image

If a right mouse click event occurs, a horizontal black line will be drawn on the image

```

cv2.line(image,(0, y), (width, y), (0,0,0),
thickness= 4 )
cv2.imshow('Image', image)

image =
cv2.imread('D:/pdf2image/pdf2/stemi/photo226.jpg', 1)

height = image.shape[0]
width = image.shape[1]

cv2.imshow("Image", image)
cv2.setMouseCallback('Image', click_event)

cv2.waitKey(0)

array_x.append(width)
array_y.append(height)
array_x.sort()
array_y.sort()
print(array_x)
print(array_y)

cv2.namedWindow('temp',cv2.WINDOW_NORMAL)
cv2.resizeWindow('temp', 400, 200)

outputdir = "lead_images/"

count = 1

for i in range(1, len(array_y)-2):

    for j in range(1, len(array_x) - 2):
        print('start = ' + str(array_x[j])+ ' ' +
str(array_y[i]))
        print('end = ' + str(array_x[j+1])+ ' ' +
str(array_y[i+1]))
        temp = image[array_y[i]:array_y[i+1],
array_x[j]:array_x[j+1]]

```

reading and displaying the image

creating an output directory where the images will be stored

Saving the rectangles formed in the image, into separate jpg files, hence converting single lead image into separate 12 lead images

```

        if no
os.path.exists(outputdir+'image'+str(k)+'/'):

    os.makedirs(outputdir+'image'+str(k)+'/')
    cv2.imwrite(outputdir + 'photo226.jpg',
temp)

    count = count+1

cv2.destroyAllWindows()

```

#### S4 : Finding Threshold value of Image using Deep Learning

Code

```

import numpy as np
import pandas as pd
from keras.models import Sequential
from keras.layers import Dense , Dropout
from keras.wrappers.scikit_learn import KerasRegressor
from sklearn.model_selection import cross_val_score
from sklearn.model_selection import KFold
from sklearn.preprocessing import StandardScaler
from sklearn import metrics
from sklearn.pipeline import Pipeline
from keras.callbacks import EarlyStopping,
ReduceLROnPlateau
from keras.callbacks import ModelCheckpoint
from sklearn.model_selection import train_test_split
from sklearn.metrics import f1_score
from sklearn.preprocessing import MinMaxScaler
values = pd.read_excel('ImageData.xlsx')
y = pd.read_excel('Threshold_values.xlsx')

y = y.round(0)
X = values.copy()
for i in range(1,254,1):

    j=i+1
    X[i] =values[i] -values[j]
X.drop(columns = [255] , axis = 1 , inplace = True)
X = X.apply(lambda x: 1/x )

```

Comments

Importing Libraries

Importing required files

Rounding off values  
Creating a copy of given data  
Iterating through complete  
file

Creating Delta data  
Dropping the last column  
Taking the inverse of every  
Element in X

```

for i in range(1,254,1):
    j=i+1
    X[i] =values[i] -values[j]
X = X.apply(lambda x: x*1000)

X.drop(columns = [254], axis=1, inplace = True)

X = MinMaxScaler().fit_transform(X)

X = X.round(4)

y = y.to_numpy()

X_train , X_test ,y_train , y_test = train_test_split(X,y ,
test_size = 0.05, random_state = 40)

model = Sequential()
n_cols = X.shape[1]
model.add(Dense(253, activation= 'relu', input_shape =
(n_cols,)))

model.add(Dense(253, activation = 'relu'))
model.add(Dense(253, activation = 'relu'))
model.add(Dropout(0.5))
model.add(Dense(1, activation = 'relu'))

model.compile(optimizer = 'adam', loss =
'mean_squared_error', metrics= ['accuracy'])
early_stopping_monitor = EarlyStopping(patience=15)
checkpointer = ModelCheckpoint('best_model.hdf5',monitor =
'val_loss',verbose = 2, save_best_only=True )
reduce_lr = ReduceLRonPlateau(monitor = 'val_loss', factor =
0.1 , patience = 5, min_lr = 0.01, verbose = 2 , mod = 'min')
model.fit(X_train, y_train, validation_split=0.02, epochs=
3000,verbose = 1, callbacks=[early_stopping_monitor,
checkpointer , reduce_lr])

model.load_weights('best_model_all_data_with_2.89RMSE.h
df5')

pred = model.predict(X)
pred = pred.round(0)

to integer

```

Iterating through whole file

Creating Delta Data  
 Multiplying each element of  
 Delta data by 1000  
 Dropping the last column of  
 delta Data  
 Scaling out the data

Rounding off the data up to 4  
 decimals  
 Converting the output  
 column to array  
 Splitting the data into train  
 and Test

Model Definition

Input Layers

Hidden layers Formations

Output layer

Compiling the model

Early stopping configuration

Train the model

loading the best model for  
 prediction

predicting the answer  
 Conversion of Float to int

```
score = np.sqrt(metrics.mean_squared_error(y,pred ))
```

```
print ("Score (RMSE) : {}".format(score))
```

```
pred.to_excel('Predicted_values.xlsx')
```

```
summary = model.summary()
```

applying RMSE to Predicted Data

printing the RMSE score

exporting the output as excel sheet

getting the summary of model

### S5: function for Scaling the image and preparing data

Code

```
import cv2
import numpy as np
from scipy import stats

from collections import Counter
from skimage.morphology import skeletonize
import matplotlib.pyplot as plt
def nothing(x):
    pass
cv2.namedWindow('s',cv2.WINDOW_NORMAL)
cv2.createTrackbar('R','s',0,255,nothing)
kernel = np.ones((3,3),np.uint8)

class image:
    def img(imgg,thresh):

        for ii in range(1,2):
            img1=cv2.cvtColor(imgg,cv2.COLOR_BGR2GRAY)
            img2=imgg

            while True:

                r = cv2.getTrackbarPos('R','s')

                _,th=cv2.threshold(img1,r,255,cv2.THRESH_BINARY_INV)
                thresh=th.copy()
                cv2.imshow('s',th)
```

Comments

importing the libraries

function for preprocessing the image

thresholding

|                                                                                                                                                                                                            |                                                                                              |
|------------------------------------------------------------------------------------------------------------------------------------------------------------------------------------------------------------|----------------------------------------------------------------------------------------------|
| <pre> cv2.imshow('ss',img2) if cv2.waitKey(1) &amp; 0xFF==ord('q'):     tt = cv2.dilate(th,kernel,iterations = 1)     print(tt.size)     break </pre>                                                      | dilation                                                                                     |
| <pre> for i in range(len(tt)):      for j in range(len(tt[i])):         if tt[i][j] == 0:             tt[i][j] = False         else:             tt[i][j] = True skeleton =skeletonize(tt) </pre>          | Converting the image array to True-False array                                               |
| <pre> for i in range(len(skeleton)):      for j in range(len(skeleton[i])):         if skeleton[i][j] == False:             th[i][j] = 0         else:             th[i][j] = 255  return thresh,th </pre> | skeletonizing the image<br><br>converting it back to binary array with values 0 and 255 only |
|                                                                                                                                                                                                            | returning the skeletonized image                                                             |

## S6 : Function to Remove the Letters from Images

Code

```

import cv2
import matplotlib.pyplot as plt
import numpy as np
from scipy import stats

class letter:
    def remove(img):

        scale=img

        _,scal=cv2.threshold(scale,90,255,cv2.THRESH_BINARY)

```

Comments

importing the libraries

taking the skeletonized image as the input

```

col=[]
row=[]
print(scal.shape[0], scal.shape[1])
rows = scal.shape[0]
cols = scal.shape[1]

flag = 0
for i in range(0,cols):

    flag = 0
    for j in range(rows - 10, 0, -1):
        if scal[j][i]==255 and flag == 0:
            flag = 1
        elif scal[j][i]==255 and flag == 1:
            continue
        elif scal[j][i]==0 and flag == 1:
            flag = 2

        if scal[j][i] == 255 and flag == 2:
            if 255 not in [scal[k][i] for k in range(j+1, j+5)]:
                scal=cv2.rectangle(scal,(i-10,j-
20),(i+10,j+10),(0,0,0),-1)
                scal[j][i]=0

    for i in range(0,cols):

        flag = 0
        for j in range(0,rows - 10):
            if scal[j][i]==255 and flag == 0:
                flag = 1
            elif scal[j][i]==255 and flag == 1:
                continue
            elif scal[j][i]==0 and flag == 1:
                flag = 2

            if scal[j][i] == 255 and flag == 2:
                if 255 not in [scal[k][i] for k in range(j,j-10,-1)]:
                    scal=cv2.rectangle(scal,(j,i),(j+10,i+10),(0,0,0),-1)
                    scal[j:][i] = 0

```

Removing impurities  
present above the lead graph,  
by vertically scanning every  
column of the image from  
bottom to top

Removing impurities  
present below the lead graph,  
by vertically scanning every  
column of the image from  
top to bottom

```
        break
    return scal
```

## S7 : Shadow removal from Image and calls S7 and S6 for further processing

Code

```
import cv2

import matplotlib.pyplot as plt
import numpy as np
from scipy import stats
from scale import image
from Letter_remove import letter
import xlwt
from xlwt import Workbook

wb = Workbook()

sheet4= wb.add_sheet('Sheet 4',cell_overwrite_ok=True)

def shadow_rem(img):
    rgb_planes = cv2.split(img)

    result_planes = []
    result_norm_planes = []
    for plane in rgb_planes:
        dilated_img = cv2.dilate(plane, np.ones((7,7), np.uint8))
        bg_img = cv2.medianBlur(dilated_img, 21)
        diff_img = 255 - cv2.absdiff(plane, bg_img)
        norm_img = cv2.normalize(diff_img,None, alpha=0,
beta=255, norm_type=cv2.NORM_MINMAX,
dtype=cv2.CV_8UC1)
        result_planes.append(diff_img)
        result_norm_planes.append(norm_img)

    result = cv2.merge(result_planes)
    return result
```

Comments

Importing the libraries and packages

Workbook is created

Shadow removal algorithm

```

input the ecg
for k in range(1,26):
    if k>=20 and k<=23:
        continue

    ecg=cv2.imread('ECG ('+str(k)+'),.jpg')

    thresh,scal=image.img(ecg,172)

    scal=letter.remove(scal)

    col=[]
    row=[]
    for i in range(scal.shape[1]):

        for j in range(scal.shape[0]):

            if scal[j][i]==255 and scal.shape[0]-j>5 and j>1:

                col.append(i)
                row.append(scal.shape[0]-j)
                ss=(scal.shape[0]-j)
                sheet4.write(k-1,j,ss)

wb.save('data.xls')

```

preprocessing the image and returning the skeletonized image

removing letter

Converting the image into 1D array

### S8 : MATLAB code for ECG diagnosis

Code

```

layers = [
    imageInputLayer([400 1 1])

    convolution2dLayer(3,16,'Padding','same')
    reluLayer
    fullyConnectedLayer(384)

```

Comments

400X1X1 refers to number of features per sample

384 refers to number of neurons in next FC hidden layer

```
fullyConnectedLayer(384)

fullyConnectedLayer(2)

softmaxLayer
classificationLayer];

options = trainingOptions('sgdm',...
    'MaxEpochs',500, ...
    'Verbose',false,...
    'Plots','training-progress')
```

384 refers to number of neurons in next FC hidden layer

2 refers to number of neurons in next output layer (number of output classes)
